# Supplementary material for: ortho-Substituents govern aryl aldehyde reactivity: toward lysine-targeted, tunable inhibitors of glucose-6-phosphate dehydrogenase
Source: Royal Society of Chemistry journal article supplement (doi:10.1039/d6cb00070c), 2026-05-12
Supplement: d6cb00070c1.pdf [file d6cb00070c1.pdf]

**Supporting Information**  
**for**  
***Ortho*-Substituents Govern Aryl Aldehyde**  
**Reactivity: Toward Lysine-Targeted, Tunable**  
**Inhibitors of Glucose-6-Phosphate**  
**Dehydrogenase**

*Bronwyn E. Rowland<sup>†</sup>, Kelsey D. Roy<sup>‡</sup>, Adil Alkaş<sup>†‡</sup>, Mirele Barsoum<sup>†</sup>, Tangweth Kuot<sup>‡</sup>, Jesse C.*

*Fuller<sup>†</sup>, Adrien J. Naudet<sup>#</sup>, Elisa Ospanow<sup>†</sup>, David L. Jakeman<sup>†‡\*</sup>*

<sup>†</sup> Department of Chemistry, Dalhousie University, Halifax, Nova Scotia, B3H 4R2, Canada.

<sup>‡</sup> College of Pharmacy, Dalhousie University, Halifax, Nova Scotia, B3H 4R2, Canada.

<sup>#</sup> Faculté de Pharmacie, Université Grenoble Alpes, Grenoble, 38400, France.

\* Author to whom correspondence should be addressed.

email: David.jakeman@dal.ca

## TABLE OF CONTENTS

|                                                            |           |
|------------------------------------------------------------|-----------|
| <b>1. SYNTHESIS AND CHARACTERIZATION .....</b>             | <b>4</b>  |
| <i>1.1 General methods for synthesis .....</i>             | <i>4</i>  |
| <i>1.2 Synthetic procedures and characterization .....</i> | <i>4</i>  |
| Figure S1 .....                                            | 6         |
| Figure S2 .....                                            | 7         |
| <i>1.3 NMR spectra of synthesized compounds .....</i>      | <i>8</i>  |
| Figure S3 .....                                            | 8         |
| Figure S4 .....                                            | 9         |
| Figure S5 .....                                            | 9         |
| Figure S6 .....                                            | 10        |
| Figure S7 .....                                            | 10        |
| Figure S8 .....                                            | 11        |
| Figure S9 .....                                            | 11        |
| Figure S10 .....                                           | 12        |
| <b>2. NMR AND UV-VIS STUDIES OF IMINE FORMATION .....</b>  | <b>13</b> |
| <i>2.1 Calculation of imine yield .....</i>                | <i>13</i> |
| Figure S11 .....                                           | 13        |
| Figure S12 .....                                           | 13        |
| Figure S13 .....                                           | 14        |
| <i>2.2 NMR studies .....</i>                               | <i>14</i> |
| Figure S14 .....                                           | 14        |
| Figure S15 .....                                           | 15        |
| Figure S16 .....                                           | 15        |
| Figure S17 .....                                           | 16        |
| Figure S18 .....                                           | 16        |
| Figure S19 .....                                           | 17        |
| Figure S20 .....                                           | 17        |
| Figure S21 .....                                           | 18        |
| Figure S22 .....                                           | 18        |

|                                                        |           |
|--------------------------------------------------------|-----------|
| Figure S23 .....                                       | 19        |
| Figure S24 .....                                       | 19        |
| Figure S25 .....                                       | 20        |
| <i>2.3 Additional figures for UV-Vis studies</i> ..... | <i>21</i> |
| Figure S26 .....                                       | 22        |
| Figure S27 .....                                       | 22        |
| <b>3. ADDITIONAL FIGURES</b> .....                     | <b>23</b> |
| <i>3.1 Kinetic characterization of G6PD</i> .....      | <i>23</i> |
| Figure S28 .....                                       | 23        |
| Table S1 .....                                         | 23        |
| Figure S29 .....                                       | 24        |
| <i>3.2 Determination of IC<sub>10S</sub></i> .....     | <i>24</i> |
| Figure S30 .....                                       | 24        |
| Table S2 .....                                         | 25        |
| <i>3.3 Calculation of inhibition constants</i> .....   | <i>25</i> |
| Figure S31 .....                                       | 25        |
| Figure S32 .....                                       | 26        |
| Figure S33 .....                                       | 27        |
| Table S3 .....                                         | 28        |
| <b>REFERENCES</b> .....                                | <b>29</b> |

## 1. SYNTHESIS AND CHARACTERIZATION

### 1.1 General methods for synthesis

All starting materials and solvents were used as received from commercial sources unless otherwise noted. Nuclear magnetic resonance (NMR) spectra were recorded using a 400 MHz spectrometer.  $^1\text{H}$  chemical shifts are reported in ppm relative to tetramethylsilane, referenced to the resonances of  $\text{CDCl}_3$  ( $\delta = 7.26$  ppm),  $\text{D}_2\text{O}$  ( $\delta = 4.69$  ppm), or  $\text{DMSO-d}_6$  ( $\delta = 2.50$  ppm) as internal standards.  $^{13}\text{C}$  chemical shifts are proton decoupled and reported in ppm relative to tetramethylsilane, referenced to the resonances of  $\text{CDCl}_3$  ( $\delta = 77.16$  ppm) or  $\text{DMSO-d}_6$  ( $\delta = 39.52$  ppm) as internal standards.  $^{31}\text{P}$  chemical shifts are reported in ppm, externally referenced to phosphoric acid ( $\text{H}_3\text{PO}_4$ ,  $\delta = 0.00$  ppm).  $^1\text{H}$  NMR splitting patterns are indicated as follows: s, singlet; d, doublet; dd, doublet of doublet; t, triplet; q, quartet; m, multiplet. All coupling constants ( $J$ ) are reported in Hertz (Hz). Thin-layer chromatography was performed using commercially prepared silica gel plates and visualized using long- or short-wave UV lamps. Column chromatography was performed using 40–63 micron particle size (60 Å) silica gel.

### 1.2 Synthetic procedures and characterization

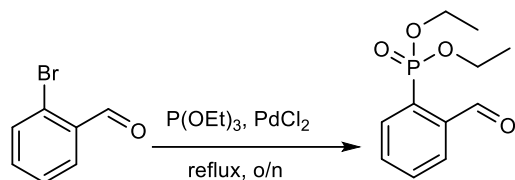

**Diethyl-ortho-formylphenylphosphonate.** 2-Bromobenzaldehyde (1.85 g, 10.00 mmol) was combined with triethyl phosphite (2.23 mL, 13.00 mmol) and  $\text{PdCl}_2$  (89 mg, 0.5 mmol), and the mixture was refluxed under nitrogen atmosphere overnight. The reaction mixture was then allowed to cool to room temperature. The crude material was columned over silica using gradient hexane:EtOAc (v:v; 95:5  $\rightarrow$  70:30) as eluent. The semi-pure product was purified over silica using gradient hexane:diethylether (v:v; 50:50  $\rightarrow$  0:100) as eluent to obtain diethyl-ortho-formylphenylphosphonate as a colourless oil (775 mg, 32%). Note: *This material is not stable over long term storage. It rapidly decomposes in the presence of  $\text{H}_2\text{O}$  and  $\text{MeOH}$ .*

$^1\text{H}$  NMR (400 MHz,  $\text{CDCl}_3$ )  $\delta$ : 10.68 (s, 1H), 8.56–7.96 (m, 2H), 7.90–7.57 (m, 2H), 4.45–3.89 (m, 4H), 1.35 (td,  $J = 7.1, 0.5$  Hz, 6H) ppm.

$^{13}\text{C}$  NMR (101 MHz,  $\text{CDCl}_3$ )  $\delta$ : 191.94 (d,  $J = 3.9$  Hz), 138.05 (d,  $J = 9.9$  Hz), 134.11 (d,  $J = 8.9$  Hz), 133.08 (d,  $J = 14.2$  Hz), 132.74 (d,  $J = 3.0$  Hz), 130.57 (d,  $J = 182.6$  Hz), 128.06 (d,  $J = 12.6$  Hz), 62.75 (d,  $J = 5.9$  Hz), 16.34 (d,  $J = 6.3$  Hz) ppm.

$^{31}\text{P}$  NMR (162 MHz,  $\text{CDCl}_3$ )  $\delta$ : 16.33 ppm. Data is in accordance with literature.<sup>1</sup>

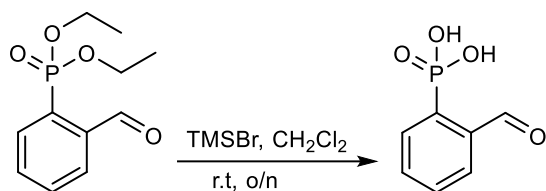

**2-Formylphenylphosphonic acid (11).** Following a literature procedure,<sup>2</sup> diethyl-ortho-formylphenylphosphonate (740 mg, 3.06 mmol) was dissolved in dichloromethane (10 mL). To this solution, bromotrimethylsilane (2.00 mL, 15.16 mmol) was added under a nitrogen atmosphere and the reaction mixture was stirred at room temperature overnight. Solvent was evaporated in vacuo, deionized water (20 mL) was added, and the solution stirred for 1 h. Aqueous phase was washed with diethylether (10 mL, X2). After removal of water, 2-formylphenylphosphonic acid was obtained as a pale orange solid (545 mg, 96%).

<sup>1</sup>H NMR (400 MHz, DMSO-d<sub>6</sub>) δ: 10.73 (d, *J* = 0.8 Hz, 1H), 7.97-7.87 (m, 2H), 7.76 (tdd, *J* = 7.6, 2.9, 1.5 Hz, 1H), 7.74-7.64 (m, 1H) ppm.

<sup>13</sup>C NMR (101 MHz, DMSO-d<sub>6</sub>) δ: 193.40 (d, *J* = 4.5 Hz), 137.67 (d, *J* = 12.3 Hz), 136.76 (d, *J* = 151.0 Hz), 133.86 (d, *J* = 12.8 Hz), 132.93 (d, *J* = 7.9 Hz), 131.96 (d, *J* = 2.8 Hz), 127.26 (d, *J* = 11.8 Hz) ppm.

<sup>31</sup>P NMR (162 MHz, DMSO-d<sub>6</sub>) δ: 9.34 ppm. Data is in accordance with the literature data.<sup>1</sup>

A pH titration of 2-formylphenylphosphonic acid (11) was performed by preparing a 50 mM solution in D<sub>2</sub>O. A pH range of about 2 to 10 (adjusted to account for the use of deuterated solvent)<sup>3</sup> was chosen to observe changes in the <sup>1</sup>H and <sup>31</sup>P NMR shifts. NaOD and DCl were used to adjust the solution to the desired pH before NMR spectra were recorded. Titration curves were fit to the equation below to derive p*K*<sub>a</sub>, where δH and δL are the fully protonated and fully deprotonated chemical shifts, respectively.<sup>4</sup>

$$Y = \frac{\delta H(10^{pK_a - pH}) + \delta L}{1 + 10^{pK_a - pH}}$$

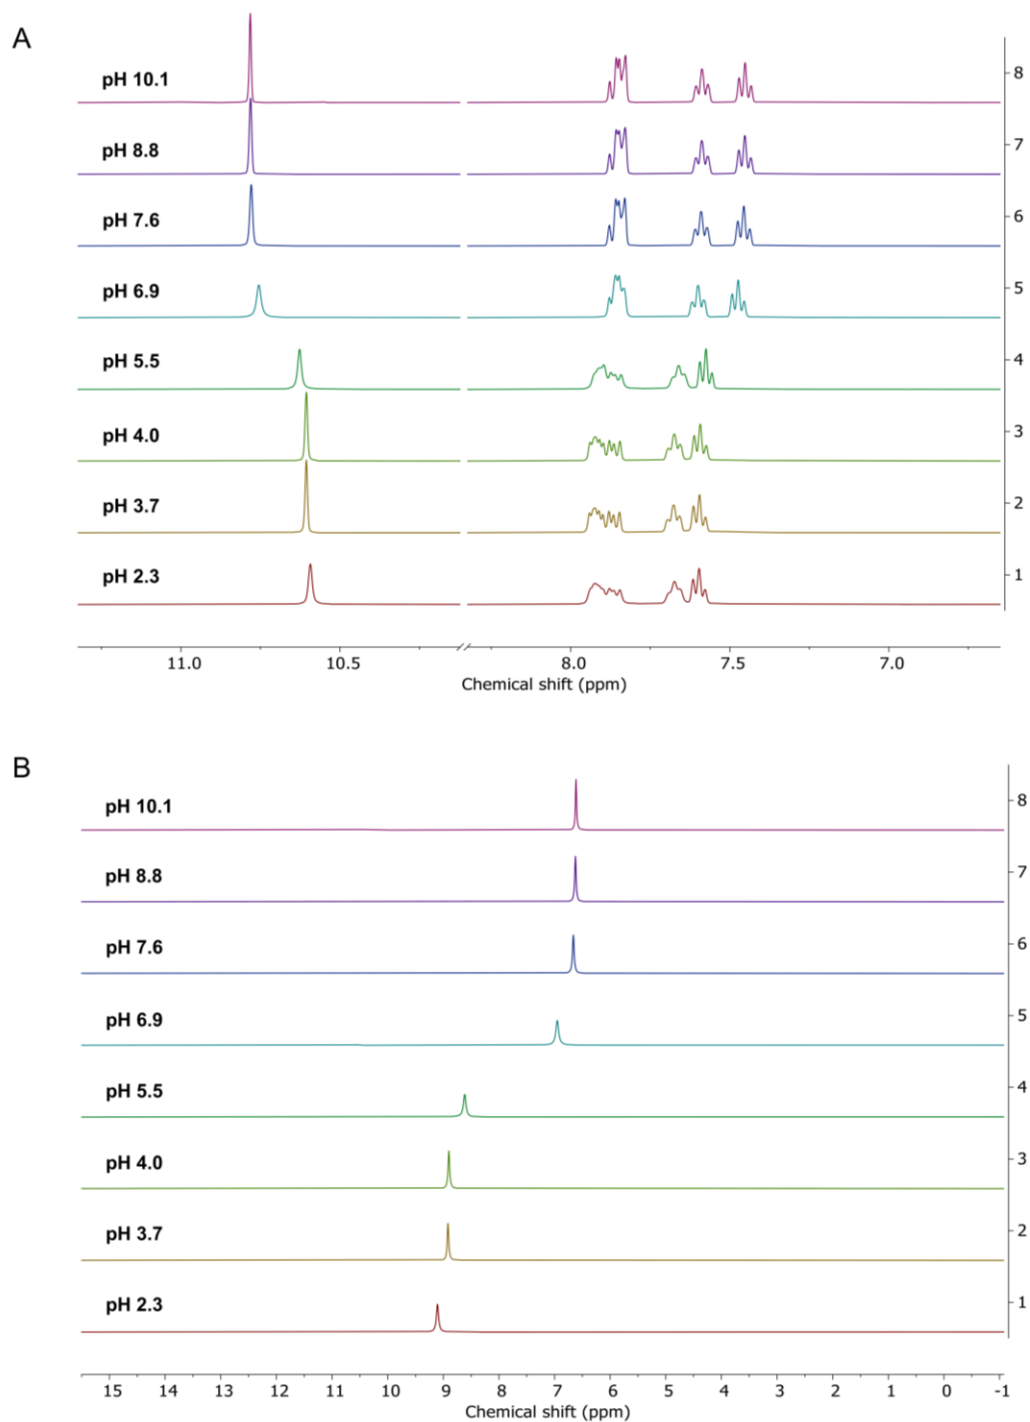

**Figure S1.** (A)  $^1\text{H}$  NMR and (B)  $^{31}\text{P}$  NMR spectra of 2-formylphenylphosphonic acid (compound **11**) across a pH titration.

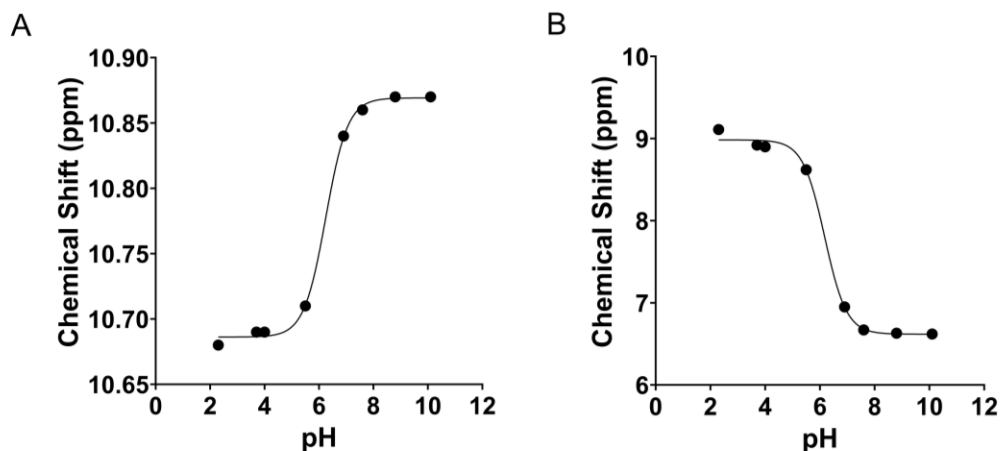

**Figure S2.** Titration curve for 2-formylphenylphosphonic acid (compound **11**) derived from (A)  $^1\text{H}$  NMR and (B)  $^{31}\text{P}$  NMR spectra. The  $\text{p}K_{\text{a}}$  was calculated as the inflection point of the fitted curve, yielding values of 6.3 and 6.2, respectively.

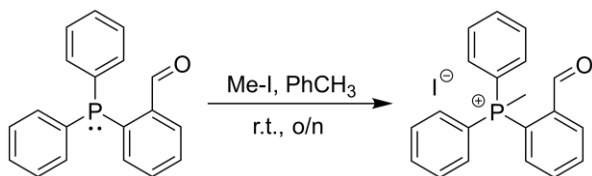

**(2-Formylphenyl)(methyl)diphenylphosphonium iodide (12).** Synthesis was performed as previously described.<sup>5</sup> Iodomethane (0.70 mL, 10.3 mM) was added to a solution of 2-(diphenylphosphino)benzaldehyde (500 mg, 1.72 mM) in toluene (40 mL), and the mixture was stirred overnight at room temperature. The yellow precipitate was filtered, washed with toluene (5 x 5 mL), and dried under vacuum. (2-Formylphenyl)(methyl)diphenylphosphonium iodide was obtained as a yellow solid (360 mg, 48.5%).  $^1\text{H}$  NMR (400 MHz,  $\text{D}_2\text{O}$ ) and  $^{31}\text{P}$  NMR (162 MHz,  $\text{D}_2\text{O}$ ) were in accordance with the literature data.<sup>5</sup>

## 1.3 NMR spectra of synthesized compounds

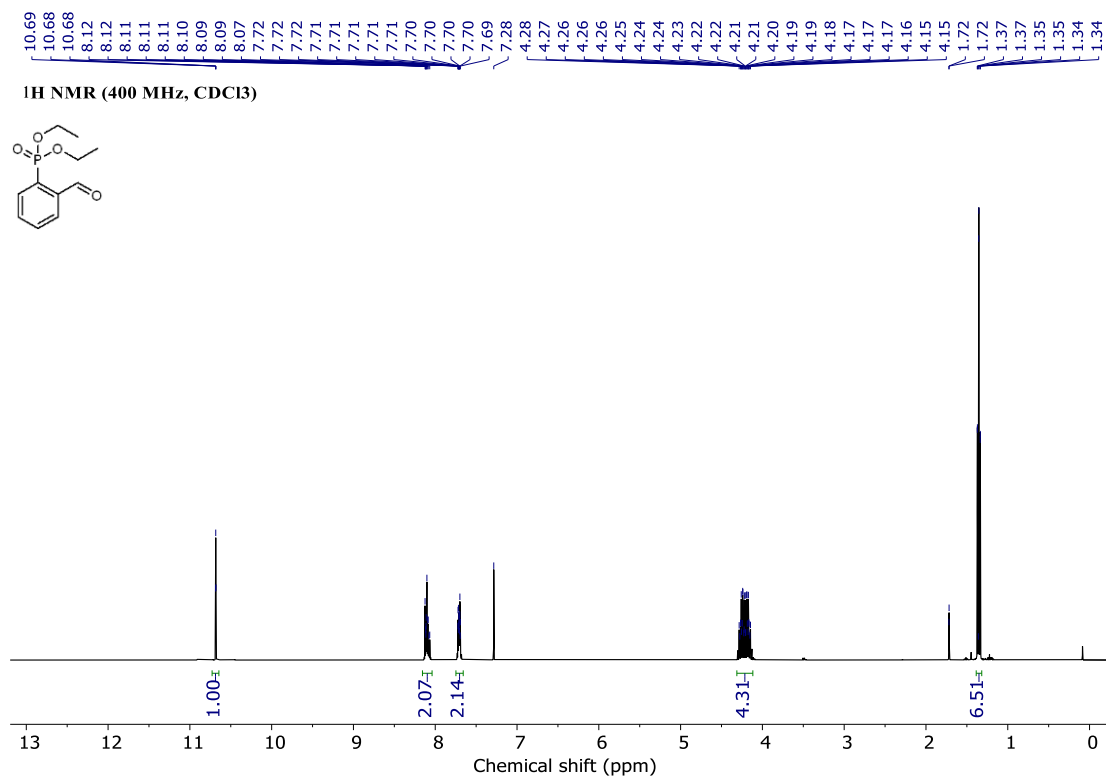

Figure S3. <sup>1</sup>H NMR spectrum of diethyl-ortho-formylphenylphosphonate.

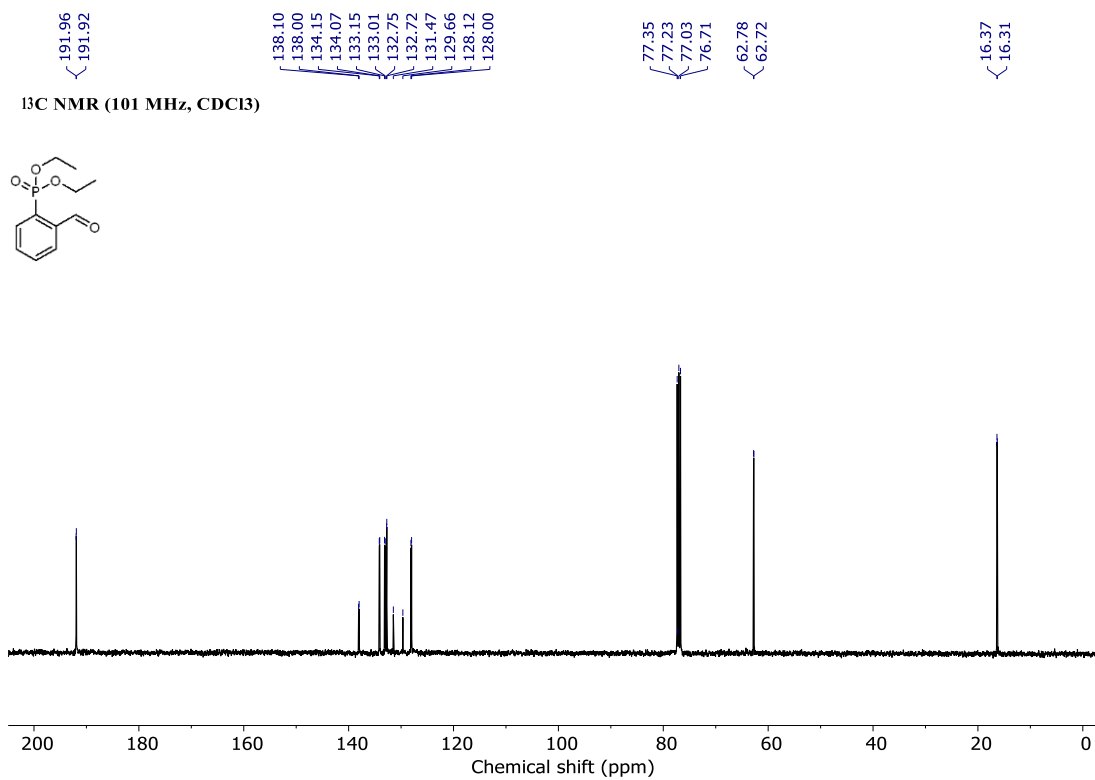

**Figure S4.** <sup>13</sup>C NMR spectrum of diethyl-ortho-formylphenylphosphonate.

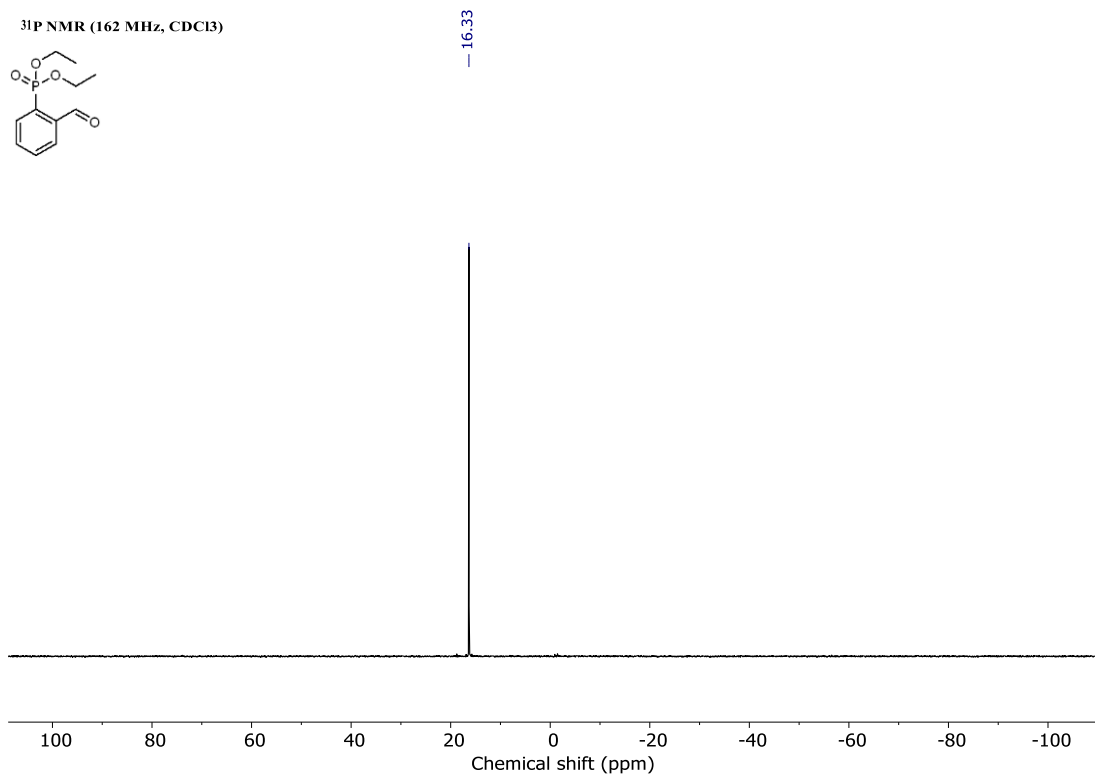

**Figure S5.** <sup>31</sup>P NMR spectrum of diethyl-ortho-formylphenylphosphonate.

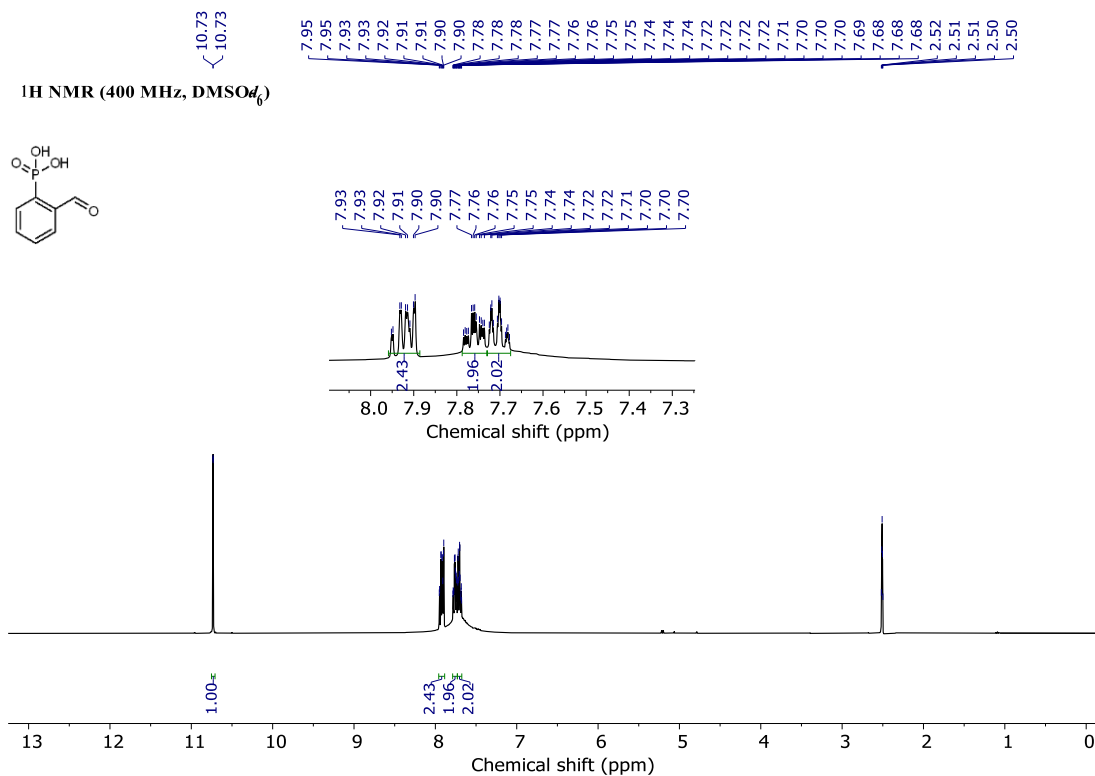

**Figure S6.** <sup>1</sup>H NMR spectrum of 2-formylphenylphosphonic acid (**11**).

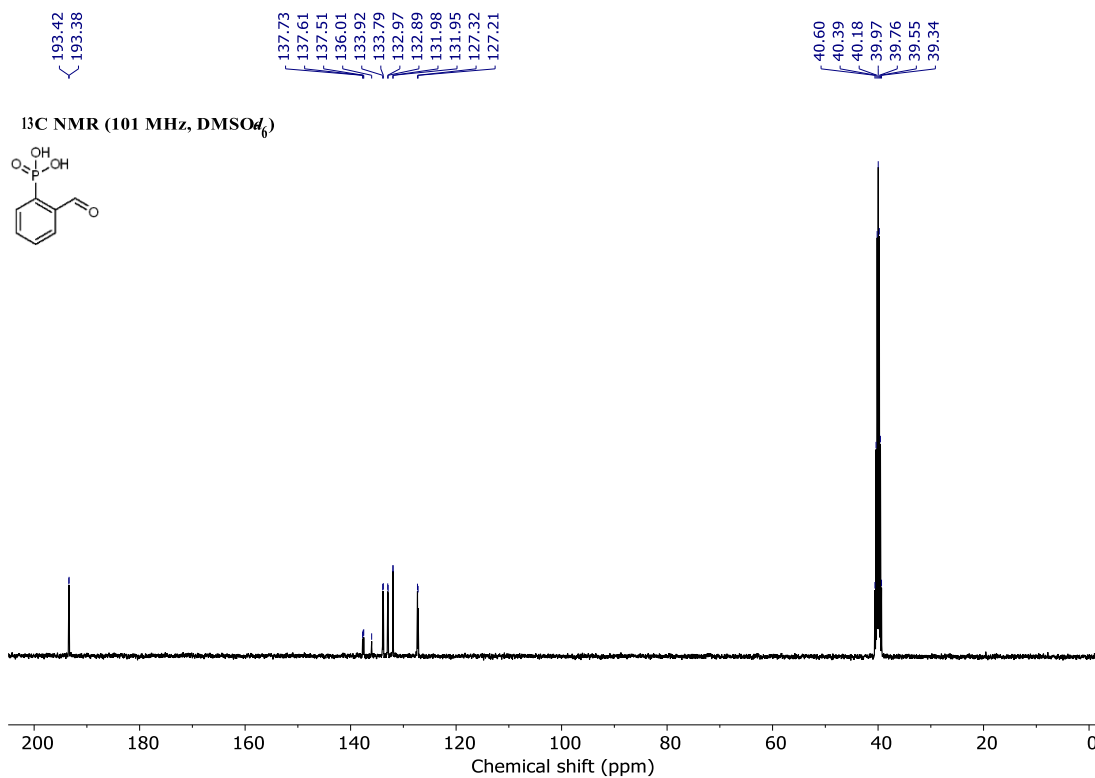

**Figure S7.** <sup>13</sup>C NMR spectrum of 2-formylphenylphosphonic acid (**11**).

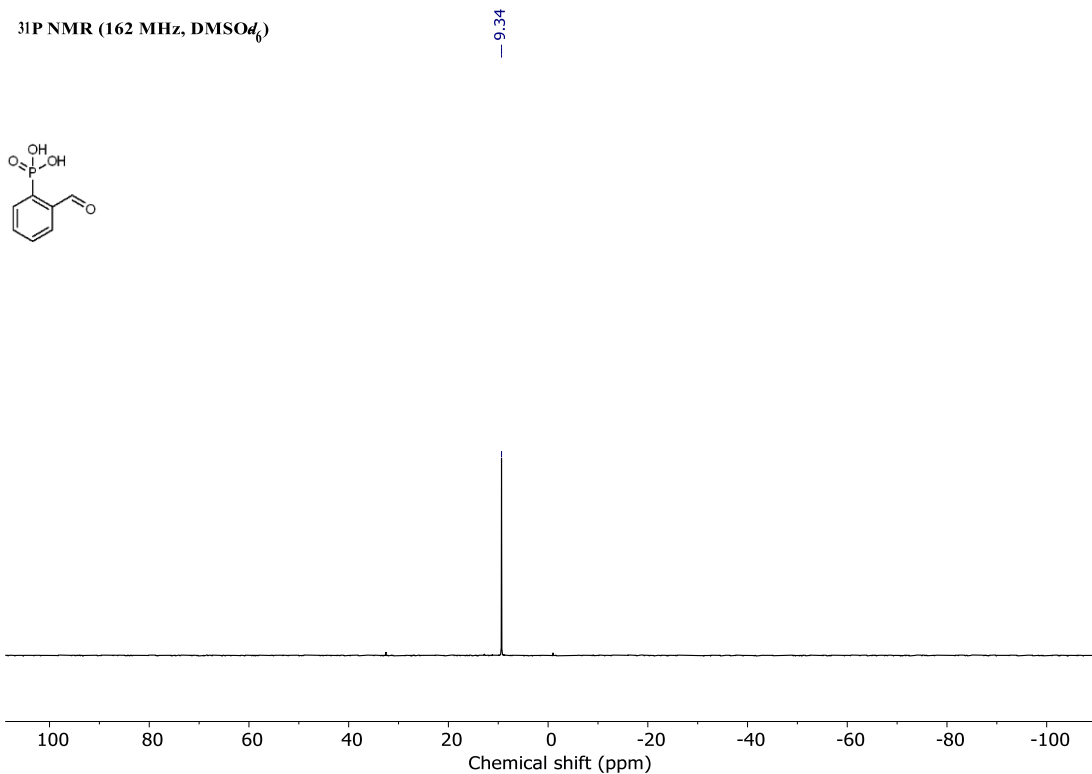

**Figure S8.** <sup>31</sup>P NMR spectrum of 2-formylphenylphosphonic acid (**11**).

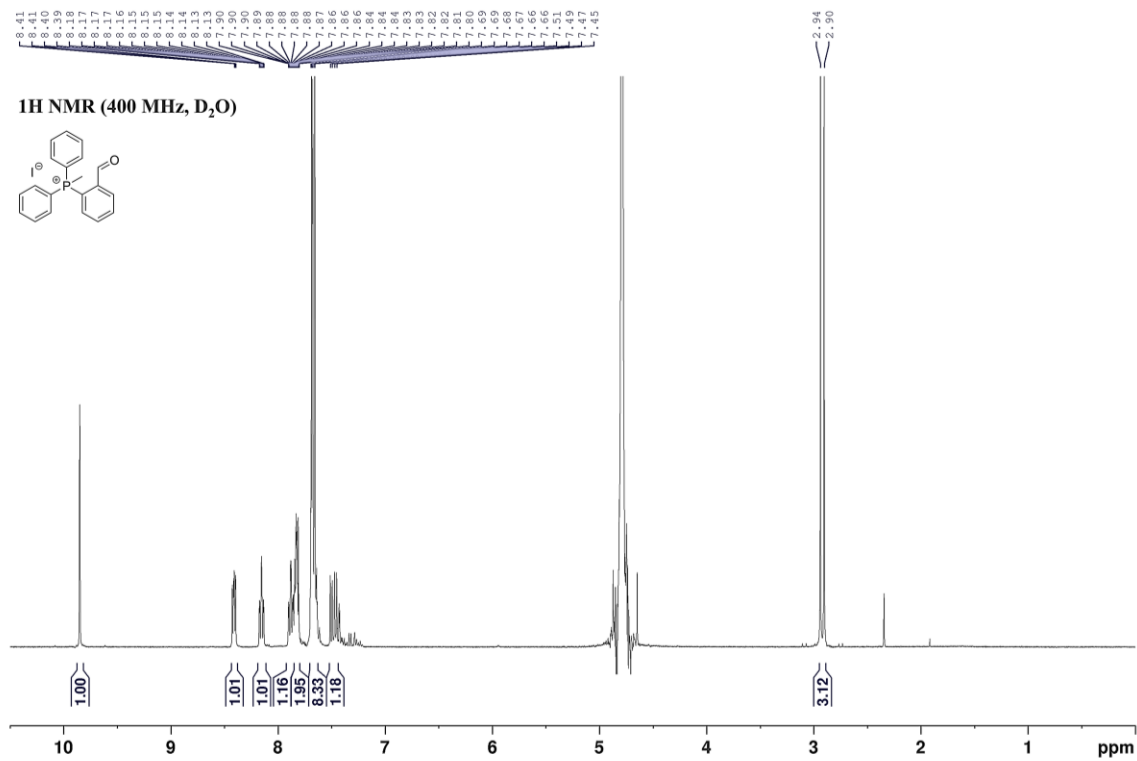

**Figure S9.** <sup>1</sup>H NMR spectrum of (2-formylphenyl)(methyl)diphenylphosphonium iodide (**12**).

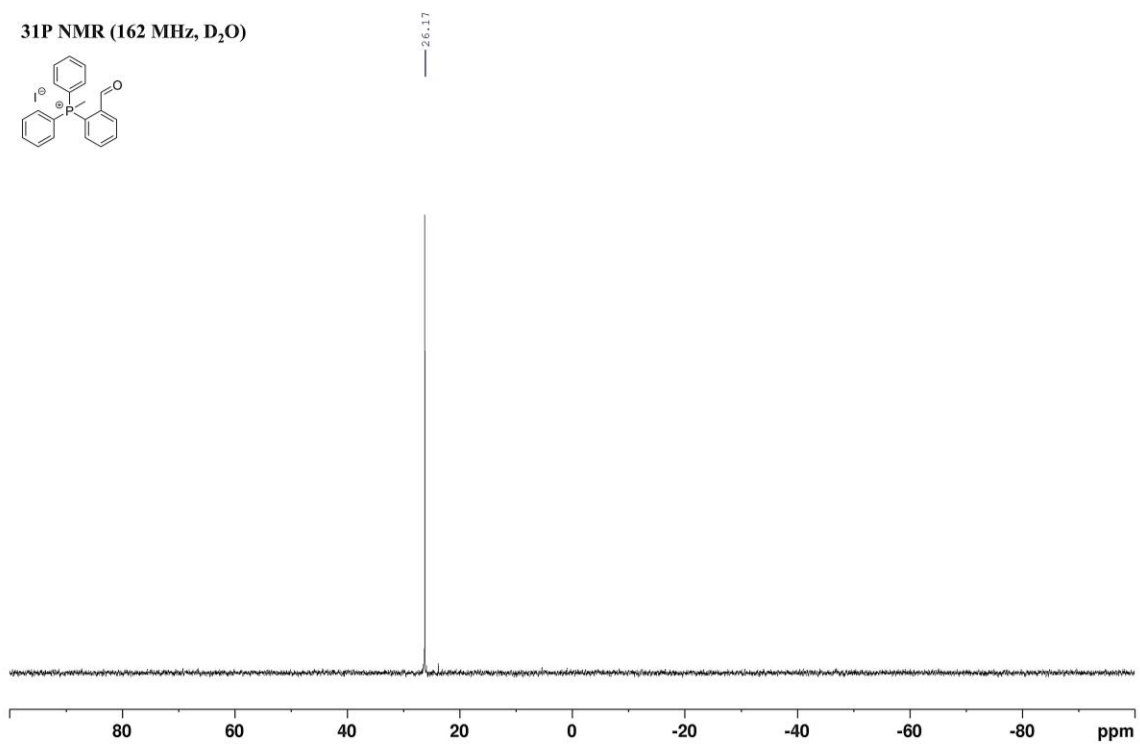

**Figure S10.** <sup>31</sup>P NMR spectrum of (2-formylphenyl)(methyl)diphenylphosphonium iodide (**12**).

## 2. NMR AND UV-VIS STUDIES OF IMINE FORMATION

### 2.1 Calculation of imine yield

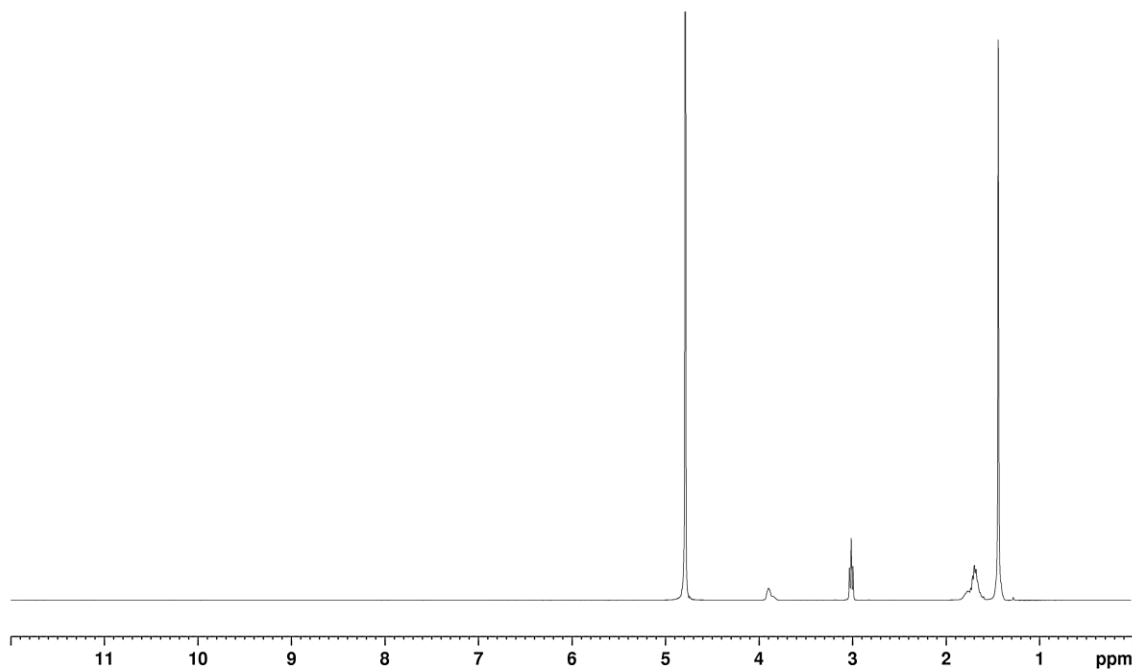

**Figure S11.**  $^1\text{H}$  NMR spectrum of Boc-Lys in PBS (pH 7.4), recorded in  $\text{D}_2\text{O}$ .

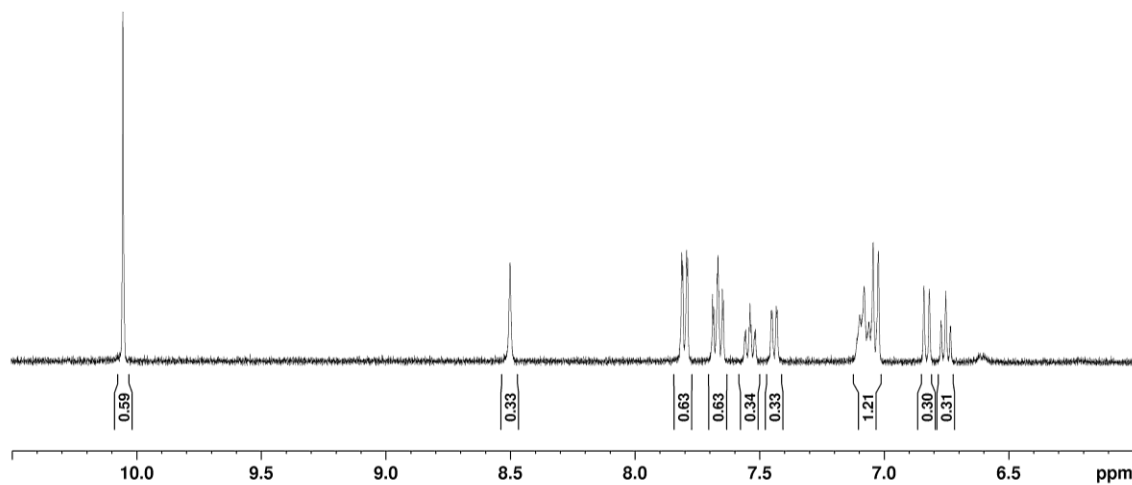

**Figure S12.** Calculation of aldehyde, imine, and hydrate abundance. Reaction between compound **3** and Boc-Lys used as example. Peak at 10.05 ppm corresponds to the unreacted aldehyde. Peak at 8.50 corresponds to the imine product. No peak observed for aldehyde hydrate (usually found between 6-6.5 ppm).<sup>6</sup> Proportion of aldehyde is therefore  $0.59/(0.59+0.33)*100 = 64.1\%$ . Proportion of imine is  $0.33/(0.59+0.33)*100 = 35.9\%$ .

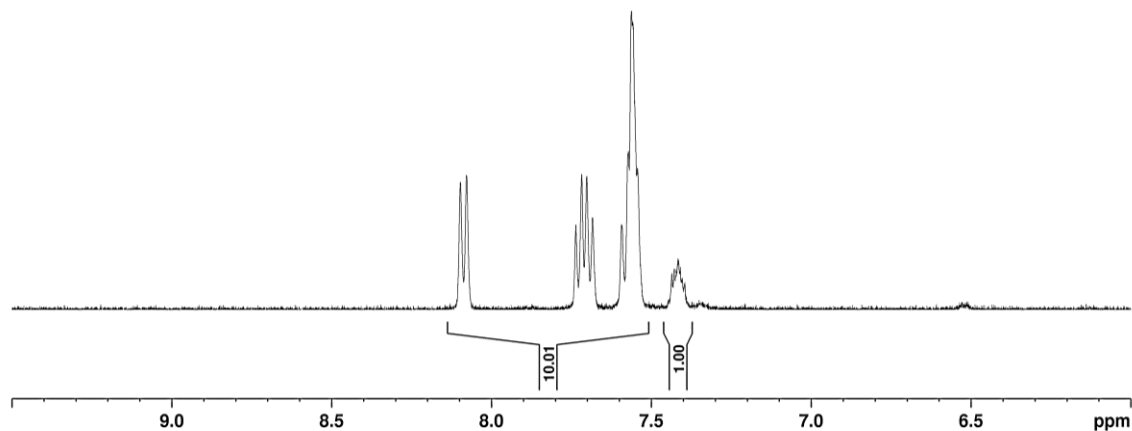

**Figure S13.** Calculation of ketone, imine, and hydrate abundance for reaction between compound **6** and Boc-Lys. Spectrum is calibrated to the peak at 7.42, corresponding to an aromatic hydrogen from the imine product. The rest of the peaks correspond to the 3 other aromatic hydrogens from the imine, and 4 from the unreacted ketone. No indication of hydrate formation was found in the spectrum. As such,  $10.01 = 3H_{\text{imine}} + (4H_{\text{ketone}})x$ , where  $x$  is the ratio of ketone to imine. Proportion of ketone to imine is therefore  $x=1.75$ , or 64% ketone and 36% imine.

## 2.2 NMR studies

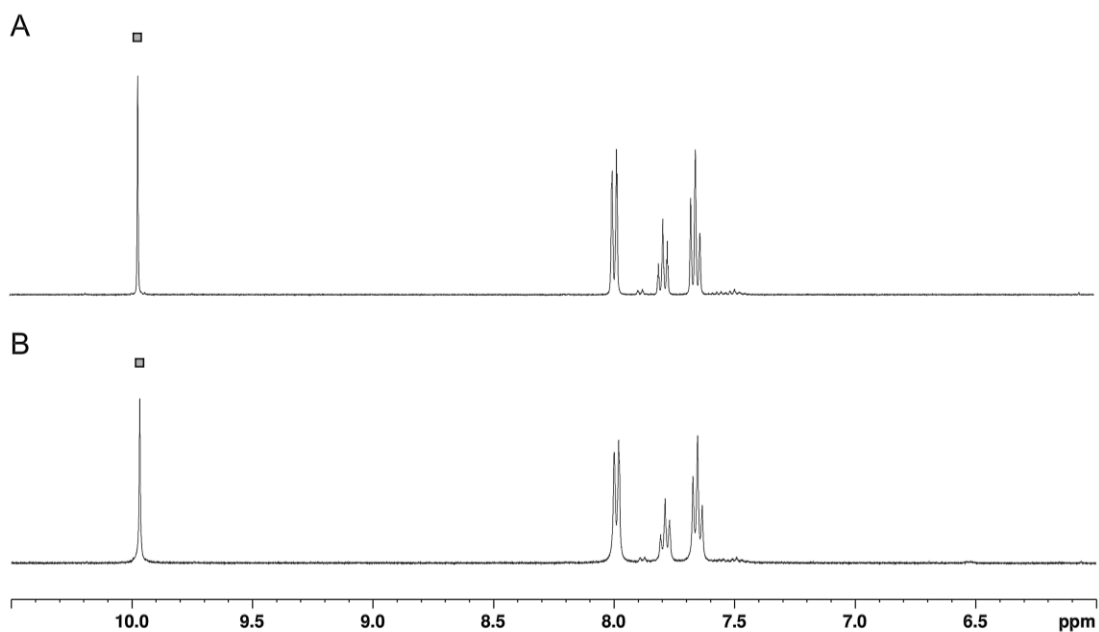

**Figure S14.**  $^1\text{H}$  NMR spectra of (A) compound **1** and (B) the reaction mixture of **1** with Boc-Lys in PBS (pH 7.4), recorded in  $\text{D}_2\text{O}$ . Solid squares (■) correspond to the aldehyde.

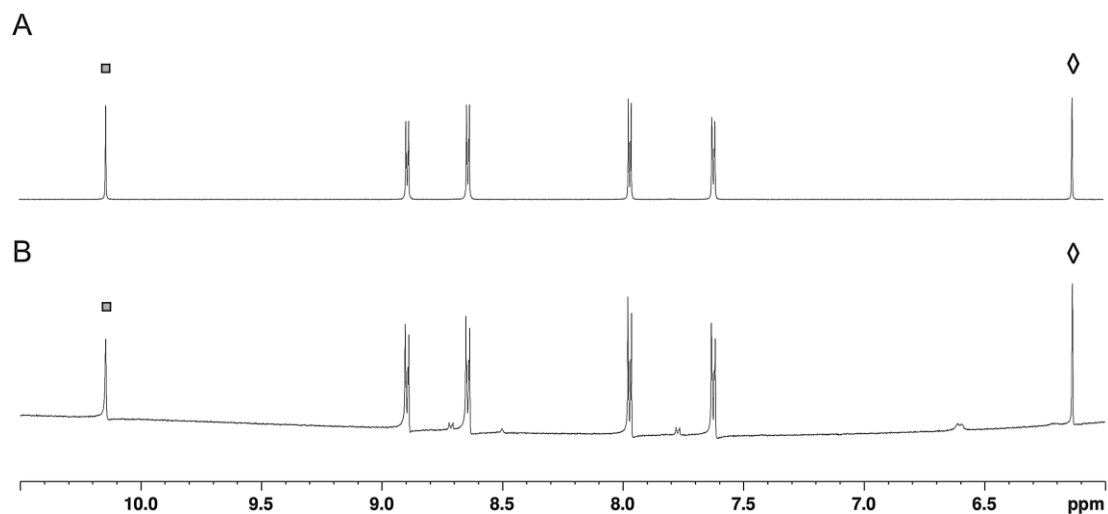

**Figure S15.** <sup>1</sup>H NMR spectra of (A) compound **2** and (B) the reaction mixture of **2** with Boc-Lys in PBS (pH 7.4), recorded in D<sub>2</sub>O. Solid squares (■) correspond to the aldehyde, open diamonds (◇) correspond to the aldehyde hydrate.

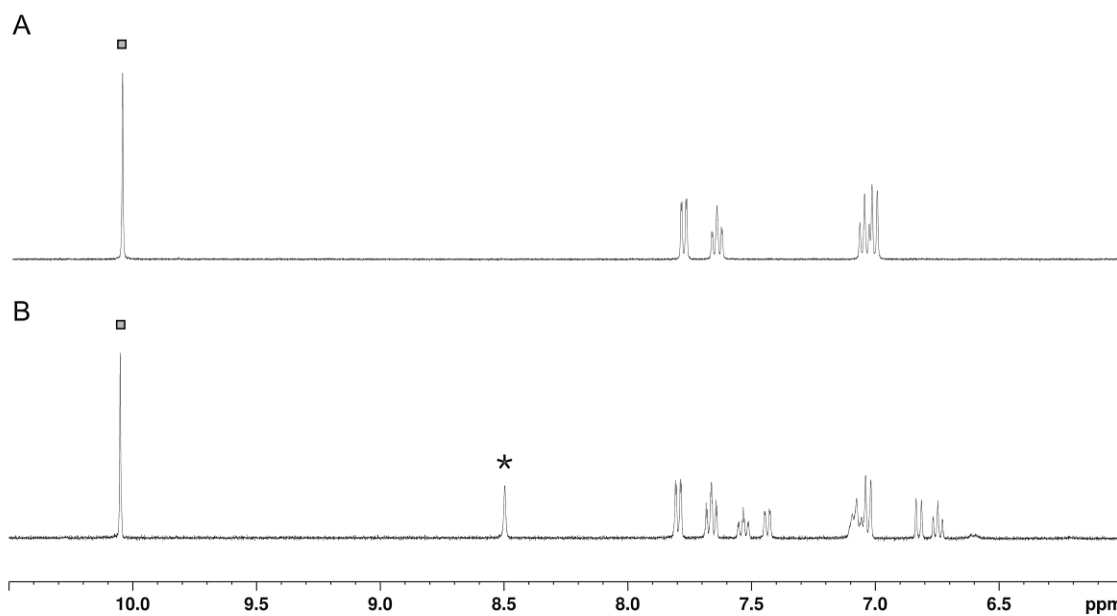

**Figure S16.** <sup>1</sup>H NMR spectra of (A) compound **3** and (B) the reaction mixture of **3** with Boc-Lys in PBS (pH 7.4), recorded in D<sub>2</sub>O. Solid squares (■) correspond to the aldehyde, asterisk (\*) corresponds to the imine.

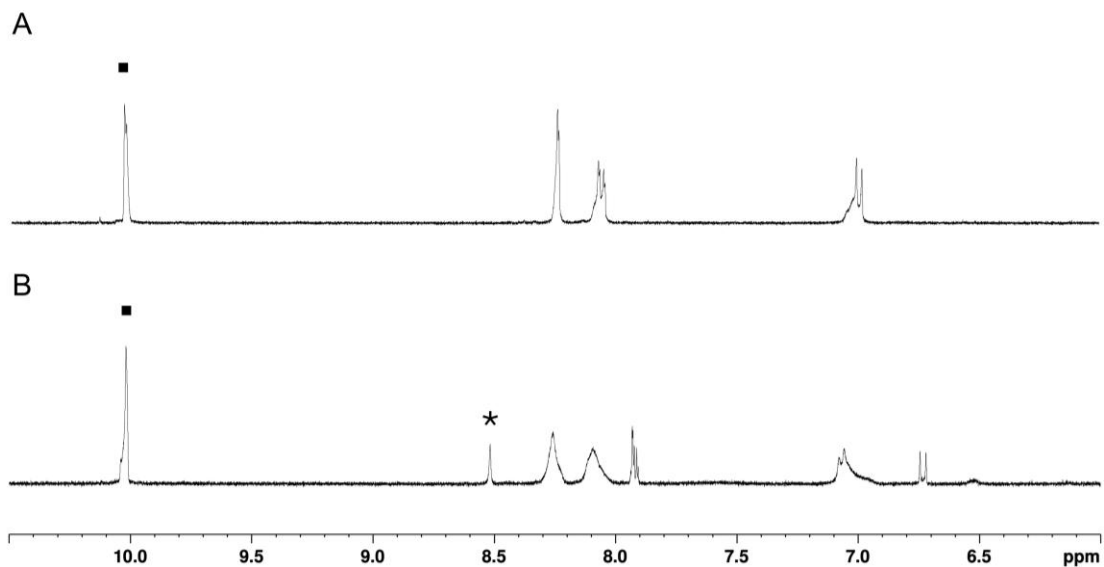

**Figure S17.** <sup>1</sup>H NMR spectra of (A) compound **4** and (B) the reaction mixture of **4** with Boc-Lys in PBS (pH 7.4), recorded in D<sub>2</sub>O. Solid squares (■) correspond to the aldehyde, asterisk (\*) corresponds to the imine.

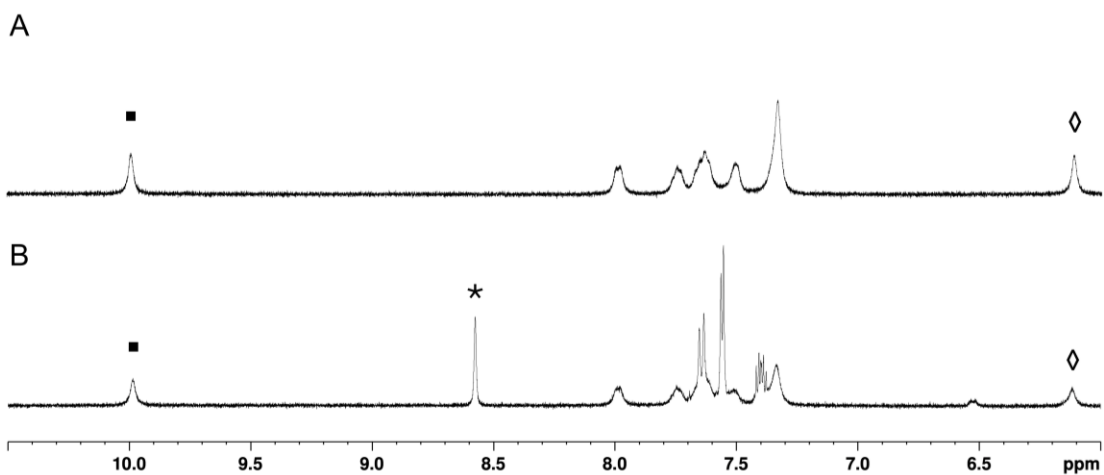

**Figure S18.** <sup>1</sup>H NMR spectra of (A) compound **5** and (B) the reaction mixture of **5** with Boc-Lys in PBS (pH 7.4), recorded in D<sub>2</sub>O. Solid squares (■) correspond to the aldehyde, asterisk (\*) corresponds to the imine. The hash symbols (#) correspond to a tautomer of compound **5** where a cyclization occurs between the aldehyde and boronic acid.<sup>7</sup>

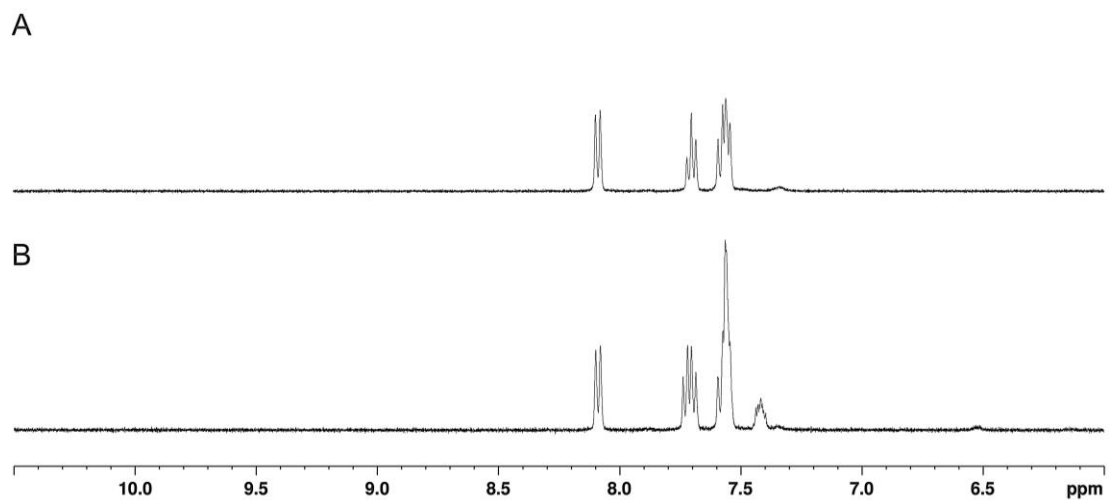

**Figure S19.** <sup>1</sup>H NMR spectra of (A) compound **6** and (B) the reaction mixture of **6** with Boc-Lys in PBS (pH 7.4), recorded in D<sub>2</sub>O.

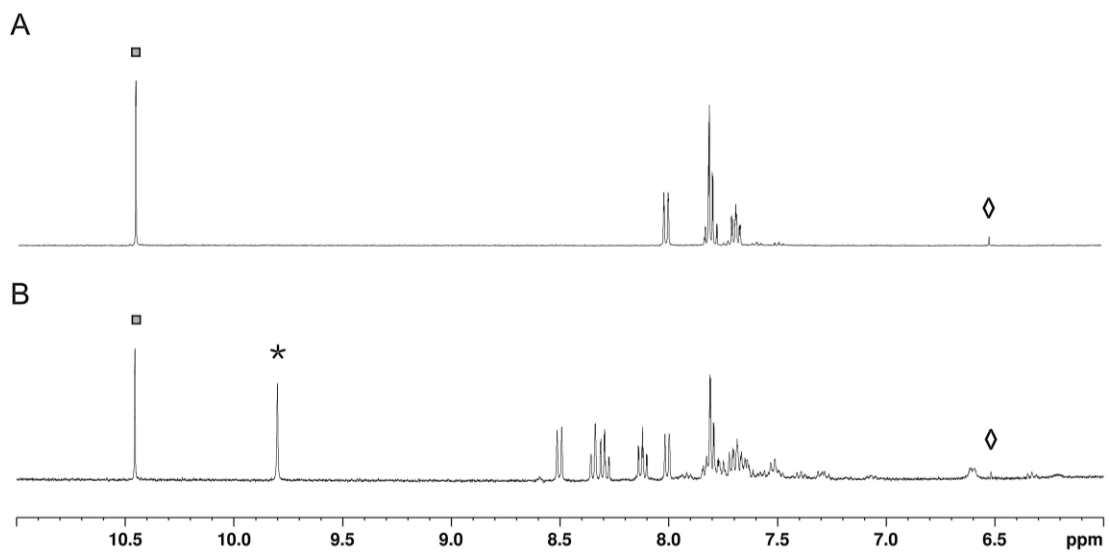

**Figure S20.** <sup>1</sup>H NMR spectra of (A) compound **7** and (B) the reaction mixture of **7** with Boc-Lys in PBS (pH 7.4), recorded in D<sub>2</sub>O. Solid squares (■) correspond to the aldehyde, open diamonds (◇) correspond to the aldehyde hydrate, asterisk (\*) corresponds to the imine.

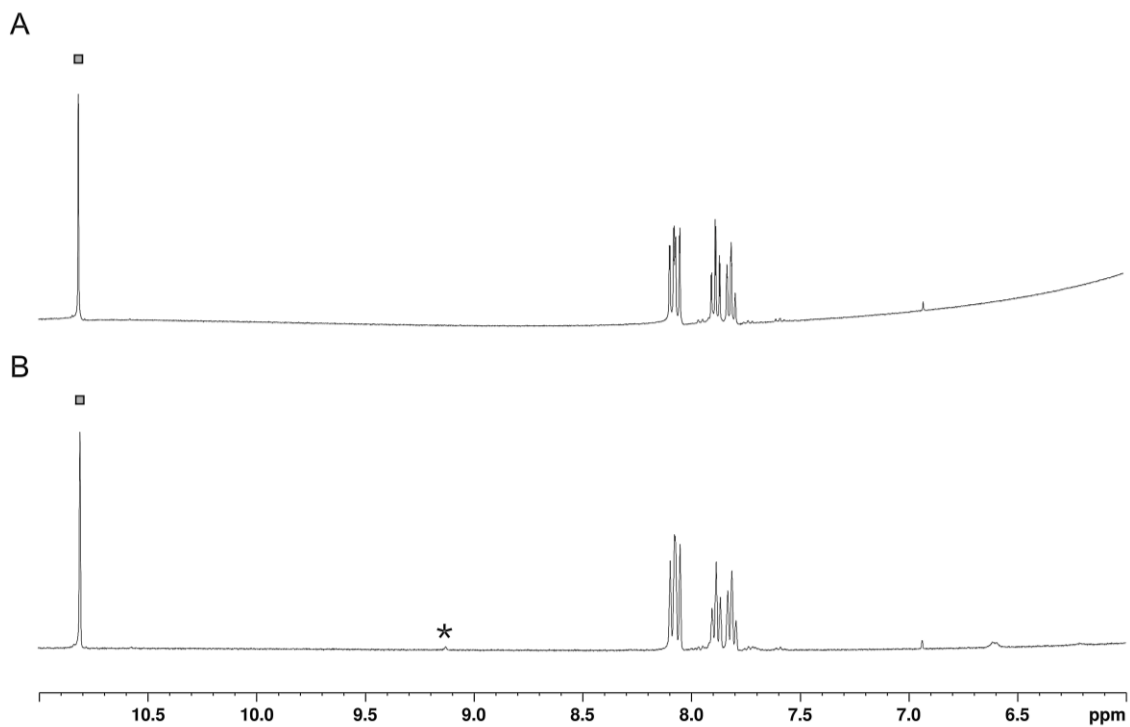

**Figure S21.** <sup>1</sup>H NMR spectra of (A) compound **8** and (B) the reaction mixture of **8** with Boc-Lys in PBS (pH 7.4), recorded in D<sub>2</sub>O. Solid squares (■) correspond to the aldehyde, asterisk (\*) corresponds to the imine.

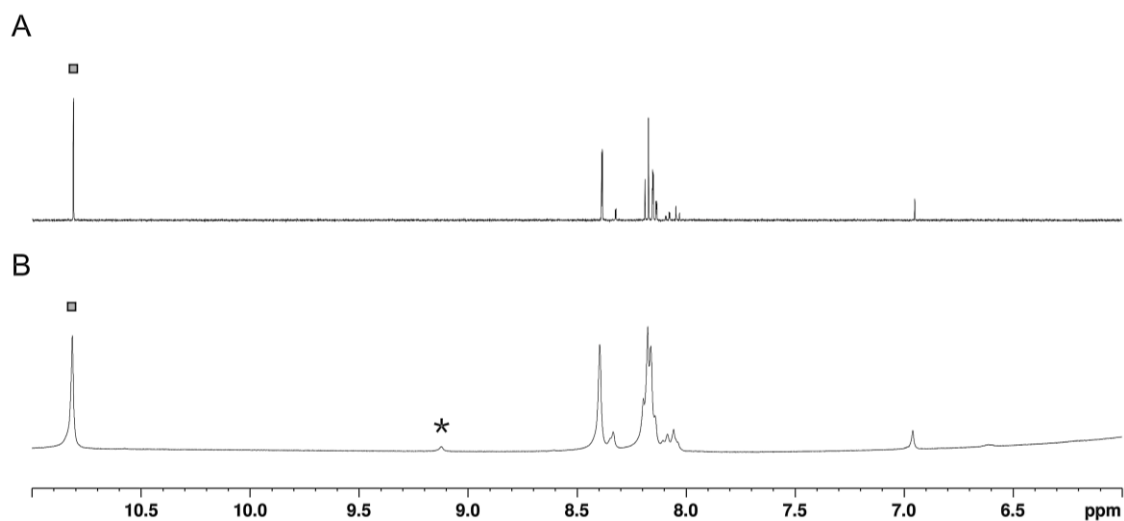

**Figure S22.** <sup>1</sup>H NMR spectra of (A) compound **9** and (B) the reaction mixture of **9** with Boc-Lys in PBS (pH 7.4), recorded in D<sub>2</sub>O. Solid squares (■) correspond to the aldehyde, asterisk (\*) corresponds to the imine.

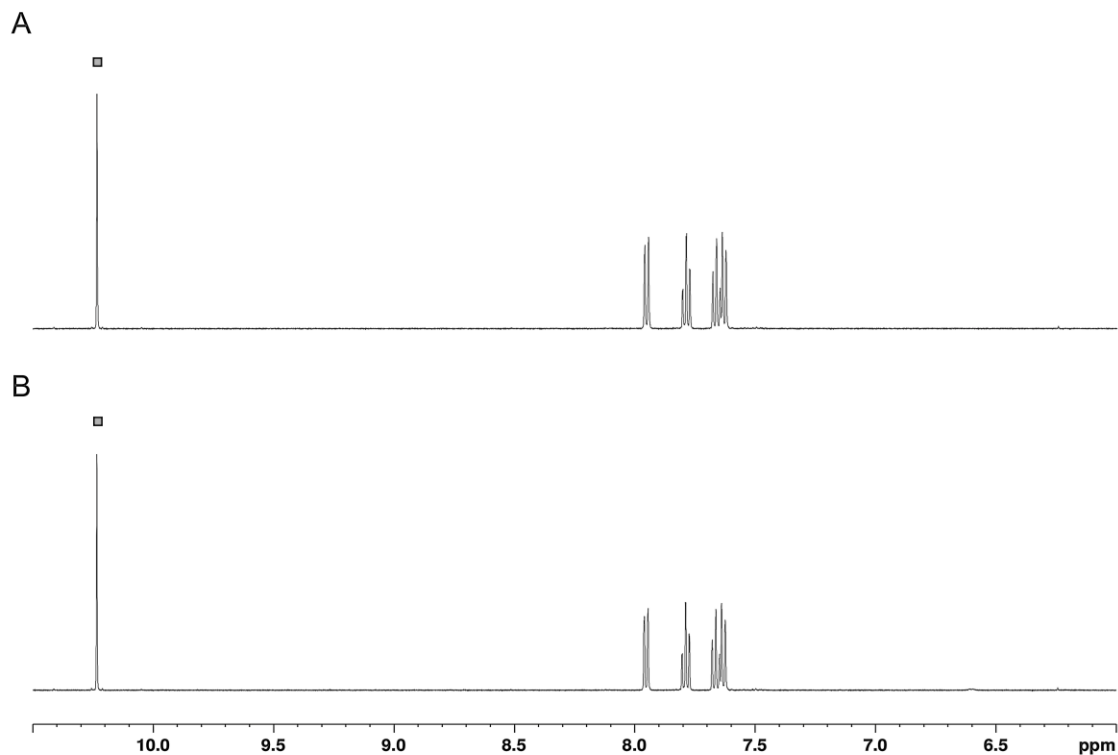

**Figure S23.**  $^1\text{H}$  NMR spectra of (A) compound **10** and (B) the reaction mixture of **10** with Boc-Lys in PBS (pH 7.4), recorded in  $\text{D}_2\text{O}$ . Solid squares (■) correspond to the aldehyde.

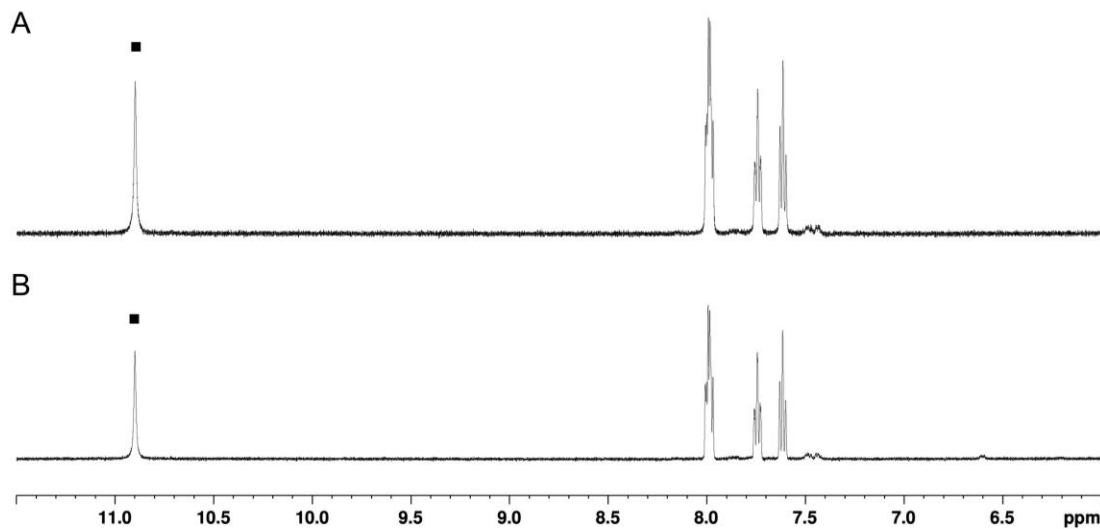

**Figure S24.**  $^1\text{H}$  NMR spectra of (A) compound **11** and (B) the reaction mixture of **11** with Boc-Lys in PBS (pH 7.4), recorded in  $\text{D}_2\text{O}$ . Solid squares (■) correspond to the aldehyde.

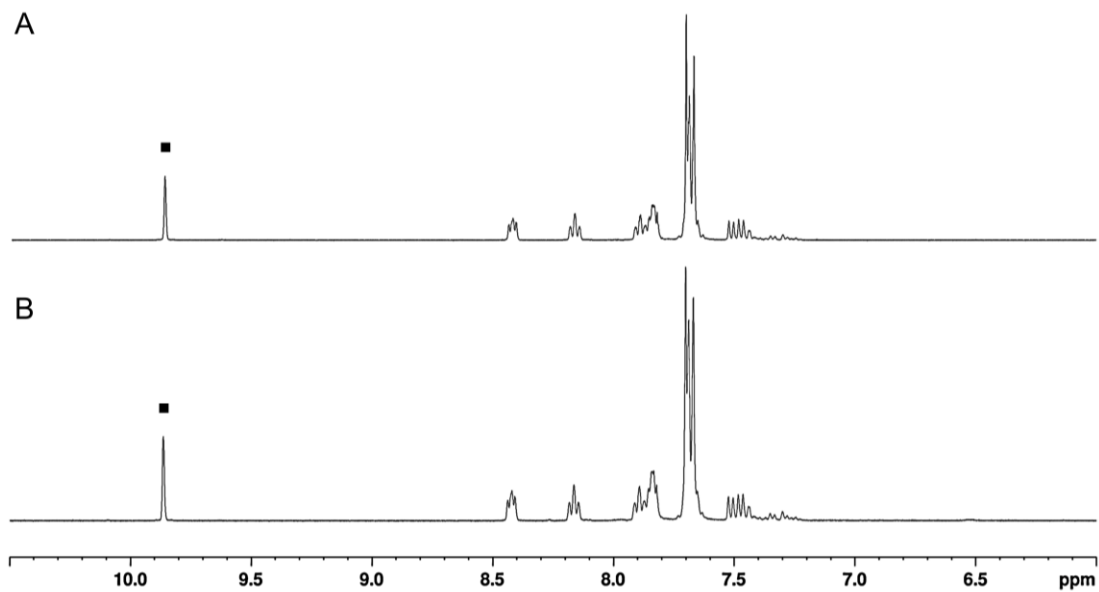

**Figure S25.** <sup>1</sup>H NMR spectra of (A) compound **12** and (B) the reaction mixture of **12** with Boc-Lys in PBS (pH 7.4), recorded in D<sub>2</sub>O. Solid squares (■) correspond to the aldehyde.

## 2.3 Additional figures for UV-Vis studies

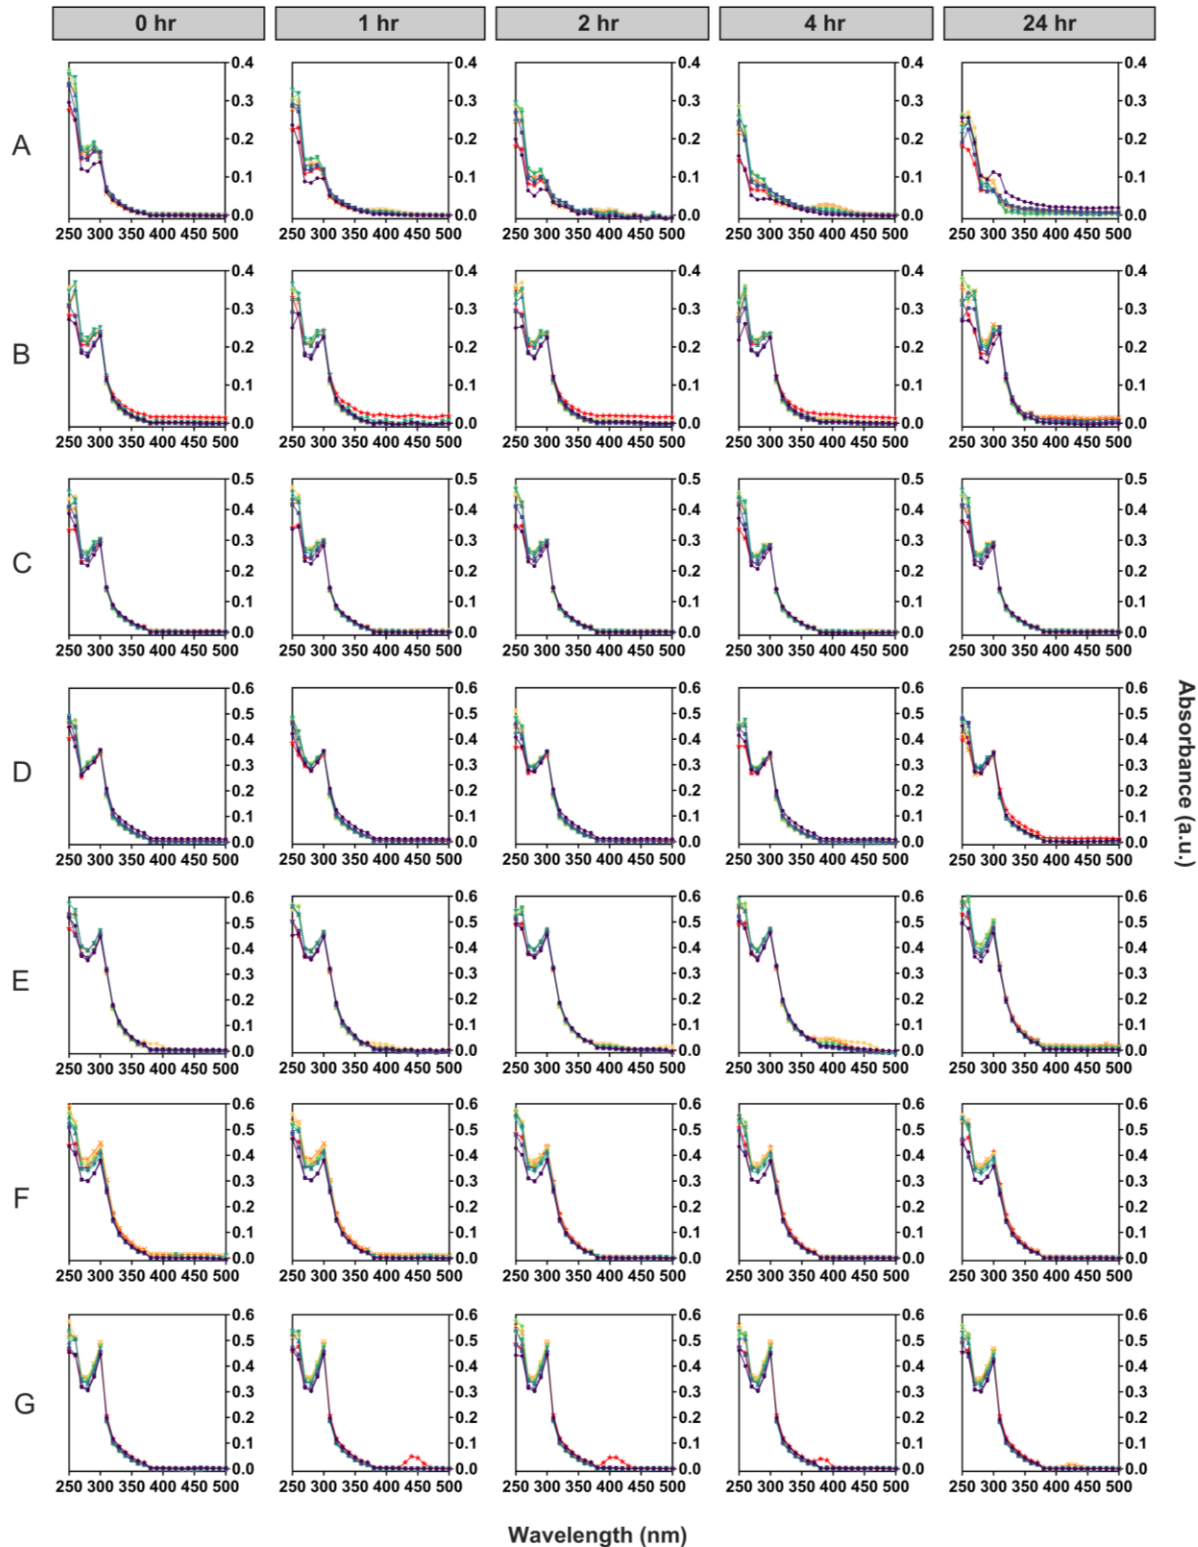

**Figure S26.** Spectrophotometric titrations of Boc-Lys with (A) benzaldehyde (**1**), (B) 4-pyridinecarboxaldehyde (**2**), (C) 2-formylbenzenesulfonic acid (**8**), (D) benzaldehyde-2,4-disulfonic acid (**9**), (E) 2-carboxybenzaldehyde (**10**), (F) 2-formylphenylphosphonic acid (**11**), and (G) (2-formylphenyl)(methyl)diphenylphosphonium iodide (**12**). Reaction mixtures contained 1 mM aryl aldehyde/ketone with 100 mM (★), 60 mM (✕), 40 mM (✱), 20 mM (◆), 10 mM (▼), 5 mM (▲), 2 mM (■), or 0 mM (●) Boc-Lys in PBS (pH 7.4). Reactions carried out at room temperature and spectra recorded at 0, 1, 2, 4, and 24 hrs post-initiation. Data shown correspond to one replicate.

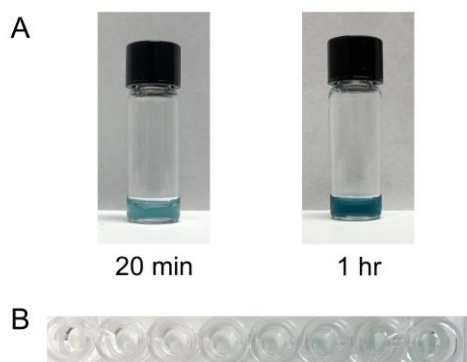

**Figure S27.** Isoquinolinium adduct production in reaction between **7** and Boc-Lys. (A) Colour change over time in a reaction mixture of 2 mM compound **7** and 20 mM Boc-Lys in PBS (pH 7.4). Solution turns from clear to blue-green within 20 min. (B) Colour change after 24 hours in reaction mixtures containing 1 mM compound **7** and varying concentrations of Boc-Lys (0 mM (left), 2 mM, 5 mM, 10 mM, 20 mM, 40 mM, 60 mM, 100 mM (right)).

### 3. ADDITIONAL FIGURES

#### 3.1 Kinetic characterization of G6PD

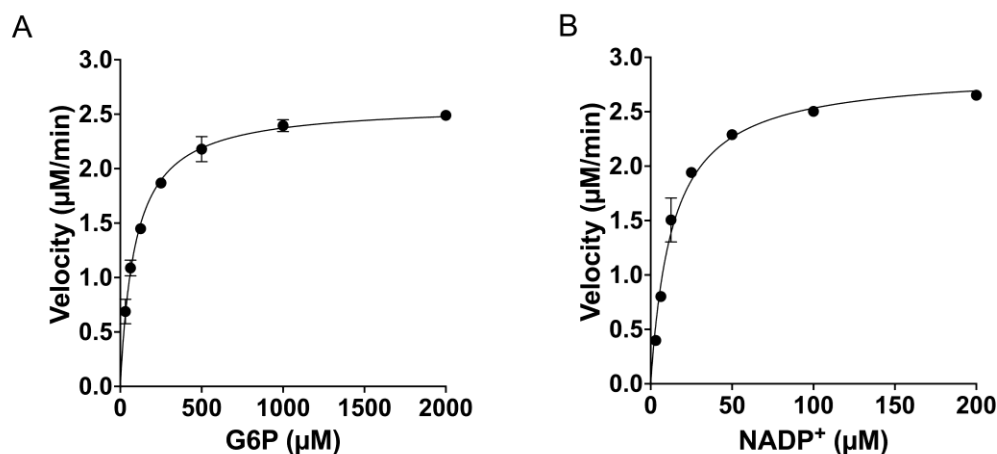

**Figure S28.** Michaelis-Menten curves of (A) G6P substrate and (B) NADP<sup>+</sup> coenzyme for *L. mesenteroides* G6PD. G6PD activity was determined via NADPH production across varying substrate/coenzyme concentrations. Initial velocities were plotted as a function of substrate/coenzyme concentration and fit to Eqn. 3. Data shown are mean  $\pm$  SD (n=2). Some error bars are smaller than the data points.

**Table S1.** Apparent kinetic parameters of *L. mesenteroides* G6PD.

| Substrate         | $K_m^{\text{app}}$ (mM) <sup>a</sup> | $V_{\text{max}}^{\text{app}}$ (μM/min) <sup>a</sup> |
|-------------------|--------------------------------------|-----------------------------------------------------|
| G6P               | 92.0 ( $\pm$ 5.1)                    | 2.6 ( $\pm$ 0.1)                                    |
| NADP <sup>+</sup> | 13.4 ( $\pm$ 1.2)                    | 2.9 ( $\pm$ 0.1)                                    |

<sup>a</sup>Data reported as parameter estimates  $\pm$  SE (n=2), derived from nonlinear least-squares regression.

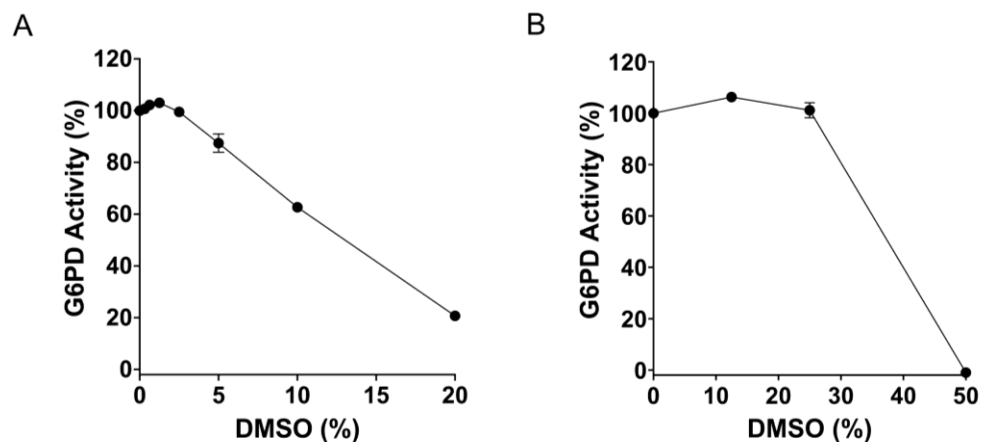

**Figure S29.** *L. mesenteroides* G6PD tolerance to DMSO. (A) Effect of DMSO in a reaction mixture of 0.001 U/mL G6PD, 100  $\mu$ M NADP<sup>+</sup>, and 500  $\mu$ M G6P in MOPS buffer (pH 7.4). (B) Effect of DMSO incubated with 0.025 U/mL G6PD in MOPS buffer (pH 7.4) (30 min, r.t.). Enzyme activity measured after a 50-fold dilution with substrate and coenzyme, such that final concentrations were 0.0005 U/mL G6PD, 100  $\mu$ M NADP<sup>+</sup>, 500  $\mu$ M G6P, and 0-1% DMSO. Data shown are mean  $\pm$  SD (n=2). Some error bars are smaller than the data points.

### 3.2 Determination of IC<sub>10S</sub>

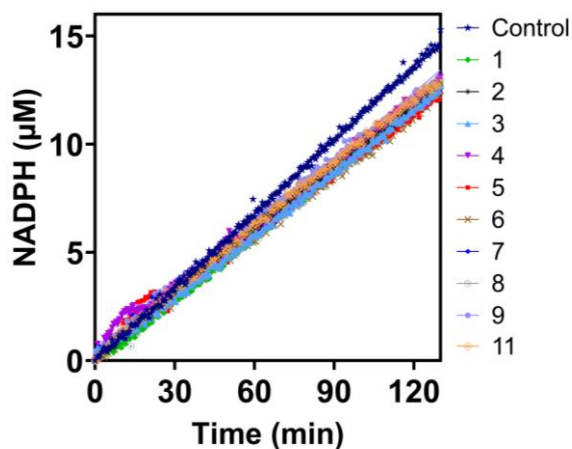

**Figure S30.** Verification of estimated IC<sub>10S</sub> for *L. mesenteroides* G6PD inhibitors. G6PD activity was measured via NADPH production in reaction mixtures containing 0.001 U/mL G6PD, 100  $\mu$ M NADP<sup>+</sup>, 500  $\mu$ M G6P, and aryl aldehyde (compounds **1-9**, **11**). Aryl aldehyde concentration was chosen such that ~90% G6PD activity remained compared to the uninhibited control (**Table S2**). Enzyme activity was estimated by linear regression of the progress curves. Data shown correspond to one replicate.

**Table S2.** Estimated  $IC_{10S}$  of *L. mesenteroides* G6PD inhibitors.

| Aryl aldehyde/ketone | Concentration (mM) | Velocity ( $\mu\text{M}/\text{min}$ ) | G6PD activity (%) |
|----------------------|--------------------|---------------------------------------|-------------------|
| <b>Control</b>       | –                  | 0.113                                 | 100.0             |
| <b>1</b>             | 0.2                | 0.097                                 | 85.7              |
| <b>2</b>             | 4.0                | 0.099                                 | 87.3              |
| <b>3</b>             | 0.01               | 0.096                                 | 85.1              |
| <b>4</b>             | 0.2                | 0.099                                 | 87.5              |
| <b>5</b>             | 0.3                | 0.096                                 | 84.9              |
| <b>6</b>             | 0.4                | 0.094                                 | 83.3              |
| <b>7</b>             | 0.05               | 0.099                                 | 87.3              |
| <b>8</b>             | 5.0                | 0.097                                 | 85.6              |
| <b>9</b>             | 2.0                | 0.103                                 | 91.1              |
| <b>11</b>            | 6.0                | 0.102                                 | 89.8              |

### 3.3 Calculation of inhibition constants

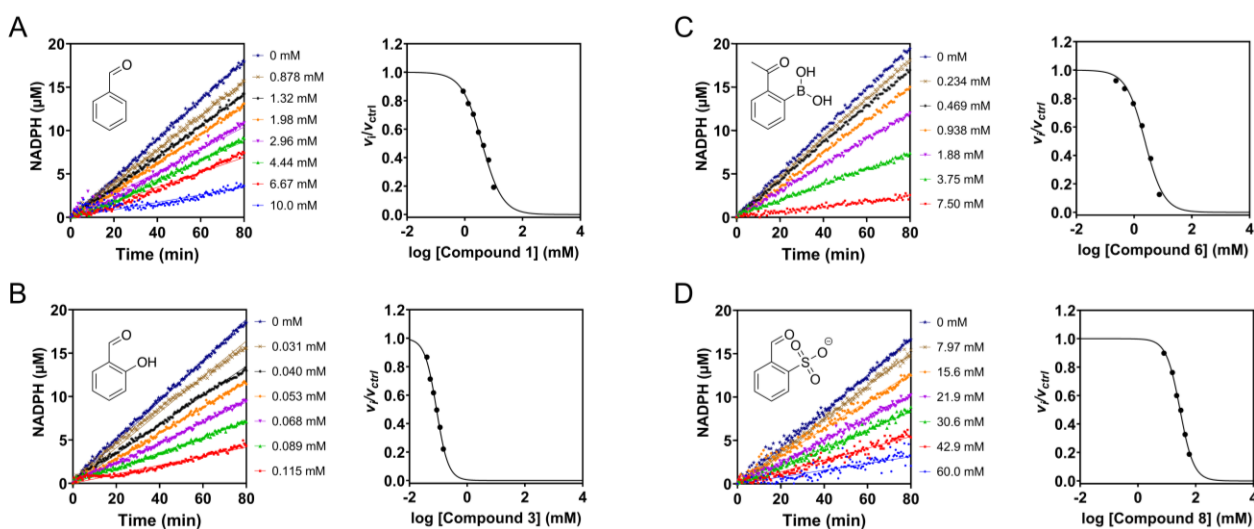

**Figure S31.** Determination of  $K_i^{\text{app}}$  for rapid-equilibrium inhibitors of *L. mesenteroides* G6PD. Compounds are (A) benzaldehyde (**1**), (B) salicylaldehyde (**3**), (C) 2-acetylphenylboronic acid (**6**), and (D) 2-formylbenzenesulfonic acid (**8**). Progress curves produced by inhibited and uninhibited reactions were fit by linear regression to obtain  $v_i$  and  $v_{\text{ctrl}}$ , respectively. Normalized velocities ( $v_i/v_{\text{ctrl}}$ ) were plotted against log-transformed inhibitor concentration and then fit to Eqn 6 to derive  $K_i^{\text{app}}$ . Error bars from propagated uncertainty of  $v_i$  and  $v_{\text{ctrl}}$  SEs are smaller than the data points, derived from nonlinear least-squares regression of one experimental replicate.

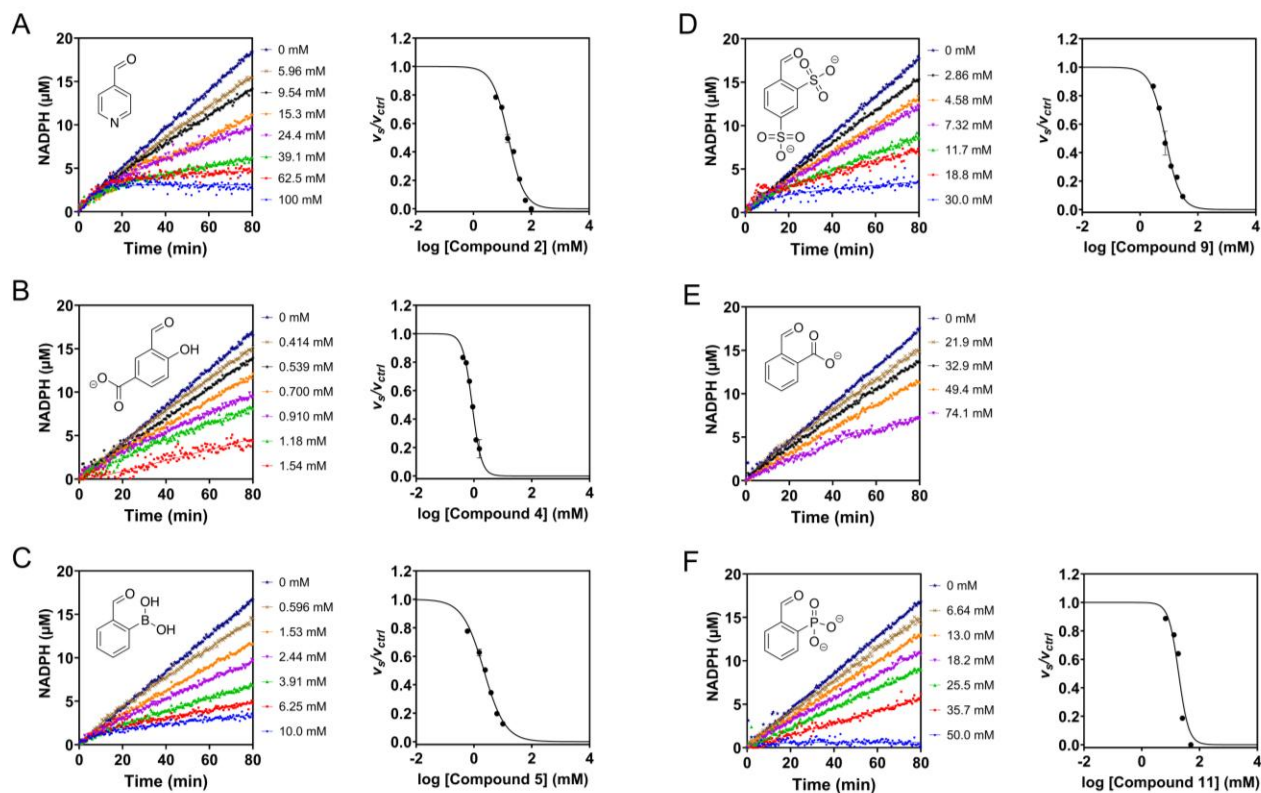

**Figure S32.** Determination of  $K_i^{*app}$  for reversible-covalent inhibitors of *L. mesenteroides* G6PD. Compounds are (A) 4-pyridinecarboxaldehyde (**2**), (B) 3-formyl-4-hydroxybenzoic acid (**4**), (C) 2-formylphenylboronic acid (**5**), (D) benzaldehyde-2,4-disulfonic acid (**9**), (E) 2-carboxybenzaldehyde (**10**), and (F) 2-formylphenylphosphonic acid (**11**). Progress curves produced by inhibited and uninhibited reactions were fit using Eqn 5 and linear regression, respectively, to obtain  $v_s$  and  $v_{ctrl}$ , respectively. Normalized velocities ( $v_s/v_{ctrl}$ ) were plotted against log-transformed inhibitor concentration, and then fit to Eqn 6 to derive  $K_i^{*app}$ . A dose-response curve and thus  $K_i^{*app}$  weren't obtained for **10** as inhibition was limited within the compound's range of solubility. Error bars show propagated uncertainty from  $v_s$  and  $v_{ctrl}$  SEs, derived from nonlinear least-squares regression of one experimental replicate.

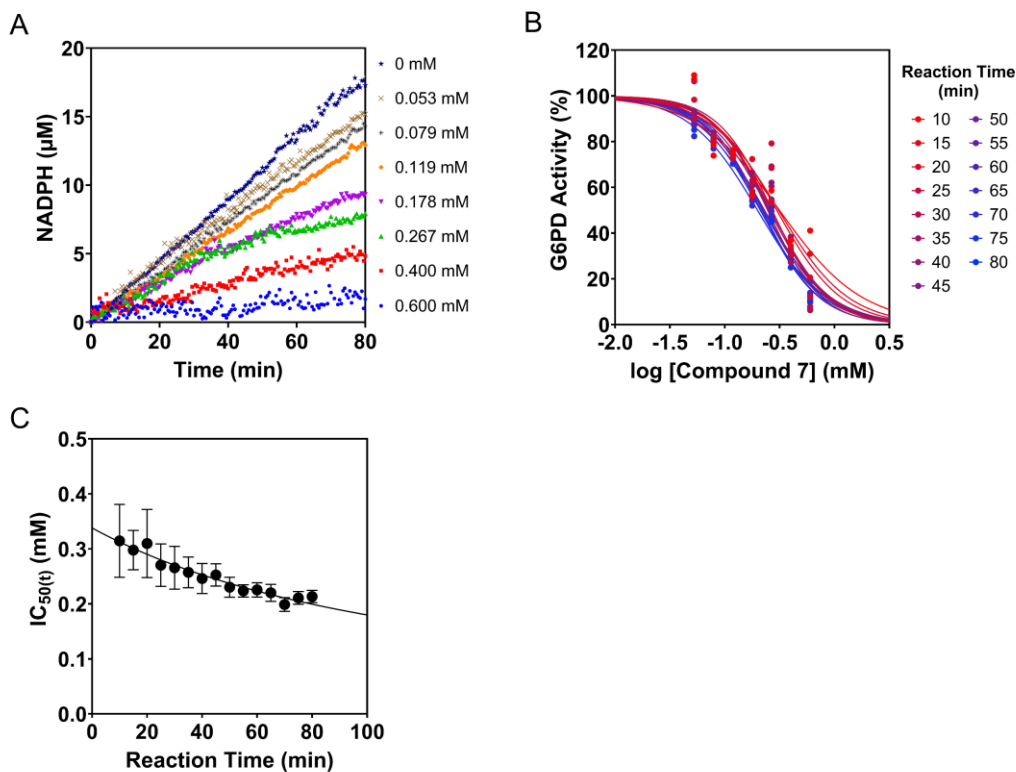

**Figure S33.** Determination of  $K_1^{\text{app}}$  and  $k_2$  for irreversible-covalent inhibitor of *L. mesenteroides* G6PD, 2-ethynylbenzaldehyde (7). (A) End-point concentrations of NADPH were sampled from inhibitor progress curves at 15 timepoints. (B) Concentrations were plotted against log-transformed inhibitor concentration and fit to Eqn 8 to obtain time-dependent  $\text{IC}_{50}$  values ( $\text{IC}_{50(t)}$ ). (C) A plot of  $\text{IC}_{50(t)}$  against time was fit to Eqn 9 to derive  $K_1^{\text{app}}$  and  $k_2$ . Error bars represent  $\text{IC}_{50(t)}$  SE, derived from nonlinear least-squares regression of one experimental replicate.

**Table S3.** Estimated pK<sub>a</sub>s of *L. mesenteroides* G6PD lysine residues<sup>ab</sup>

| <b>Residue number</b> | <b>pK<sub>a</sub></b> | <b>Residue number</b> | <b>pK<sub>a</sub></b> |
|-----------------------|-----------------------|-----------------------|-----------------------|
| 5                     | 11.7                  | 265                   | 11.3                  |
| 19                    | 11.0                  | 273                   | 12.1                  |
| 21                    | 10.4                  | 282                   | 12.1                  |
| 31                    | 12.3                  | 298                   | 11.5                  |
| 32                    | 12.6                  | 311                   | 11.4                  |
| 37                    | 11.2                  | 338                   | 14.5                  |
| 55                    | 12.0                  | 343                   | 10.3                  |
| 63                    | 11.2                  | 352                   | 11.7                  |
| 96                    | 12.0                  | 376                   | 10.7                  |
| 105                   | 11.8                  | 382                   | 12.1                  |
| 128                   | 11.8                  | 386                   | 10.6                  |
| 131                   | 11.3                  | 408                   | 10.6                  |
| 148                   | 12.0                  | 409                   | 11.4                  |
| 182                   | 11.9                  | 441                   | 11.8                  |
| 204                   | 11.9                  | 454                   | 11.2                  |
| 208                   | 13.1                  | 461                   | 11.5                  |
| 252                   | 11.3                  | 472                   | 11.4                  |
| 259                   | 11.0                  | 484                   | 11.2                  |

<sup>a</sup>pK<sub>a</sub>s estimated using PypKa (pKAI prediction model).<sup>8,9</sup>

<sup>b</sup>The two lysine residues with the lowest pK<sub>a</sub> values are highlighted in green.

## REFERENCES

- 1 J. L. Turnbull, B. R. Benlian, R. P. Golden and E. W. Miller, *J. Am. Chem. Soc.*, 2021, **143**, 6194–6201.
- 2 K. Qian, S. M. Shepard, T. Xin, G. Park and C. C. Cummins, *J. Am. Chem. Soc.*, 2023, **145**, 6045–6050.
- 3 A. Krezel and W. Bal, *J. Inorg. Biochem.*, 2004, **98**, 161–166.
- 4 G. Schenck, K. Baj, J. A. Iggo and M. Wallace, *Anal. Chem.*, 2022, **94**, 8115–8119.
- 5 I. Neira, A. Blanco-Gómez, J. M. Quintela, C. Peinador and M. D. García, *Org. Lett.*, 2019, **21**, 8976–8980.
- 6 C. Godoy-Alcántar, A. K. Yatsimirsky and J.-M. Lehn, *J. Phys. Org. Chem.*, 2005, **18**, 979–985.
- 7 P. M. S. D. Cal, J. B. Vicente, E. Pires, A. V. Coelho, L. F. Veiros, C. Cordeiro and P. M. P. Gois, *J. Am. Chem. Soc.*, 2012, **134**, 10299–10305.
- 8 P. B. P. S. Reis, D.-A. Clevert and M. Machuqueiro, *Bioinformatics*, 2021, **38**, 297–298.
- 9 P. B. P. S. Reis, M. Bertolini, F. Montanari, W. Rocchia, M. Machuqueiro and D.-A. Clevert, *J. Chem. Theory Comput.*, 2022, **18**, 5068–5078.
